# Supplementary material for: Dietary Intake of Meat Cooking-Related Mutagens (HCAs) and Risk of Colorectal Adenoma and Cancer: A Systematic Review and Meta-Analysis
Source: Preprints.org preprint supplement (doi:10.20944/preprints201705.0079.v1), 2017-05-09
Supplement: Supplementary file 1 [file supplementary]

**Supplemental Table S1.** Characteristics of studies on HCAs, B(a)P and meat-derived mutagenic index (MDM) intake in association with colorectal adenoma (CRA) risk.

| Author, year<br>Location                                                                                                                                                                                                         | Study design,<br>Study name                                                                                            | Study population<br>Subjects (Age)<br>Cases/controls<br>Adenoma site                            | Exposure assessment<br>(comparisons)                                                                                                                                | HCAs and B(a)P doses<br>Meat-derived<br>mutagenicity                                                                                                                                                                        | OR/RR (95% CI)                                                                                                                                                                                                                                                                                                                                                                                                                                  | Matched or adjusted<br>variables                                                                                                                                                                                               | QS <sup>†</sup> |
|----------------------------------------------------------------------------------------------------------------------------------------------------------------------------------------------------------------------------------|------------------------------------------------------------------------------------------------------------------------|-------------------------------------------------------------------------------------------------|---------------------------------------------------------------------------------------------------------------------------------------------------------------------|-----------------------------------------------------------------------------------------------------------------------------------------------------------------------------------------------------------------------------|-------------------------------------------------------------------------------------------------------------------------------------------------------------------------------------------------------------------------------------------------------------------------------------------------------------------------------------------------------------------------------------------------------------------------------------------------|--------------------------------------------------------------------------------------------------------------------------------------------------------------------------------------------------------------------------------|-----------------|
| Sinha, 2001 [30]<br>USA<br>Bethesda,<br>Maryland                                                                                                                                                                                 | Hospital-based<br>Case-control                                                                                         | 146 colorectal adenoma<br>(mean:67, range:51-77y)<br>228 controls<br>(mean: 67, range:51-76y)   | Self-administered FFQ <sup>2</sup><br><br>Interviewer-administered<br>meat-cooking module<br><br>(highest vs. lowest<br>quintile)                                   | PhIP <sup>3</sup> (ng/day)<br>0-0.94 vs. 140-728<br>MeIQx <sup>4</sup> (ng/day)<br>0-4.6 vs. 27-179<br>DiMeIQx <sup>5</sup> (ng/day)<br>Doses not reported<br>MDM <sup>6</sup> (Rev/day)<br>0-470 vs. 5661-22500            | Colorectal: 2.5 (1.1-5.5)<br><br>Colorectal: 2.1 (1.0-4.3)<br><br>Colorectal: 2.2 (1.2-4.1)<br><br>Colorectal: 3.1 (1.4-6.8)                                                                                                                                                                                                                                                                                                                    | Age, sex, total caloric<br>intake, fiber intake,<br>reason for screening<br>(routine or other),<br>physical activity,<br>smoking, use of NSAIDs <sup>7</sup>                                                                   | 7               |
| Gunter, 2005 [31]<br>USA<br>Southern California                                                                                                                                                                                  | Population-based<br>Case-control                                                                                       | 261 colorectal adenoma<br>(mean: 61.4±0.64y)<br>304 controls<br>(mean: 61.7±0.38y)              | Self-administered FFQ<br><br>Meat preparation by in-<br>person interview<br><br>(highest vs. lowest<br>quintile)                                                    | PhIP (ng/day)<br>0-0.2 vs. 151.8-1846.8<br>MeIQx (ng/day)<br>0-2.42 vs. 40.5-265.5<br>DiMeIQx (ng/day)<br>0-0.01 vs. 2.6-42.7<br>B(a)P <sup>8</sup> (ng/day)<br>0-0.29 vs. 31.5-515.2                                       | Colorectal:1.01 (0.58-1.73)<br><br>Colorectal: 0.89 (0.52-1.55)<br><br>Colorectal: 1.15 (0.69-1.91)<br><br>Colorectal: 1.03 (0.6-1.75)                                                                                                                                                                                                                                                                                                          | Age, sex, ethnicity,<br>center, total caloric<br>intake, fruits, vegetables<br>saturated fat and alcoholic<br>beverages, physical<br>activity, smoking,<br>NSAID, BMI <sup>9</sup> , family<br>history of colorectal<br>cancer | 9               |
| Sinha, 2005 [32]<br>USA<br>Multi-center:<br>Birmingham, AL;<br>Denver, CO;<br>Detroit, MI;<br>Honolulu, HI;<br>Marshfield, WI;<br>Minneapolis, MN;<br>Pittsburgh, PA;<br>Salt Lake City, UT;<br>St. Louis, MO;<br>Washington, DC | Population-based<br>Case-control<br><br>PLCO (Prostate,<br>Lung, Colorectal,<br>and Ovarian Cancer<br>Screening Trial) | 2474 colon adenoma<br>688 rectal adenoma<br>3696 all adenoma<br>34817 controls<br>(mean: 62.8y) | 137-items FFQ<br><br>Meat-cooking methods<br>and doneness were<br>included in the FFQ<br><br>Charred database <sup>10</sup><br><br>(highest vs. lowest<br>quintile) | PhIP (ng/day)<br>0-16.8 vs. 222-13334<br><br>MeIQx (ng/day)<br>0-7.0 vs. 46.3-1230<br><br>DiMeIQx (ng/day)<br>0-0.2 vs. 2.6-159<br><br>B(a)P (ng/day)<br>0-0.8 vs. 42.7-2168<br><br>MDM (Rev/day)<br>0-1091 vs. 9354-502928 | Colon: 1.17 (1.01-1.35)<br>Rectal: 1.02 (0.79-1.33)<br>Colorectal: 1.11 (0.98-1.25)<br>Colon: 1.18 (1.01-1.38)<br>Rectal: 0.79 (0.60-1.04)<br>Colorectal: 1.08 (0.95-1.23)<br>Colon: 1.11 (0.97-1.27)<br>Rectal: 0.88 (0.69-1.13)<br>Colorectal: 1.05 (0.94-1.18)<br>Colon: 1.18 (1.02-1.35)<br>Rectal: 1.12 (0.87-1.44)<br>Colorectal: 1.15 (1.02-1.29)<br>Colon: 1.15 (0.99-1.33)<br>Rectal: 0.93 (0.71-1.23)<br>Colorectal: 1.08 (0.95-1.22) | Age, sex, screening<br>center, energy intake,<br>ethnicity, educational<br>attainment, smoking,<br>alcohol, aspirin,<br>ibuprofen, physical<br>activity, BMI, folate,<br>calcium, fiber                                        | 8               |
| Sinha, 2005 [33]<br>USA<br>Bethesda,<br>Maryland                                                                                                                                                                                 | Hospital-based Case-<br>control                                                                                        | 146 colorectal adenoma<br><br>228 controls                                                      | 100-items FFQ<br><br>Meat-cooking module<br>that<br>included 23 meat items<br><br>(highest vs. lowest<br>quintile)                                                  | B(a)P (ng/day)<br>(only from meat)<br>Doses not reported                                                                                                                                                                    | Colorectal: 2.82 (1.24-6.43)                                                                                                                                                                                                                                                                                                                                                                                                                    | Age, sex, total caloric<br>intake, fiber intake,<br>reason for screening<br>(routine or other),<br>physical activity,<br>smoking, use of NSAIDs                                                                                | 7               |
| Wu, 2006 [34]<br>USA                                                                                                                                                                                                             | Cohort study                                                                                                           | 14032 cohort (men)<br>581 distal colon                                                          | 131-item FFQ<br>cooking method                                                                                                                                      | PhIP (median ng/day)<br>14.4 vs. 220.4                                                                                                                                                                                      | Colon: 1.11 (0.85-1.46)                                                                                                                                                                                                                                                                                                                                                                                                                         | Age, family history of<br>colorectal cancer, reason                                                                                                                                                                            | 9               |

|                                                   |                                                                                |                                                                                       |                                                                                                                                          |                                                                                                                                                                                                                                                                                            |                                                                                                                                                                                                                                                                                                                                                                                                                                                                                                                                                |                                                                                                                                                    |   |
|---------------------------------------------------|--------------------------------------------------------------------------------|---------------------------------------------------------------------------------------|------------------------------------------------------------------------------------------------------------------------------------------|--------------------------------------------------------------------------------------------------------------------------------------------------------------------------------------------------------------------------------------------------------------------------------------------|------------------------------------------------------------------------------------------------------------------------------------------------------------------------------------------------------------------------------------------------------------------------------------------------------------------------------------------------------------------------------------------------------------------------------------------------------------------------------------------------------------------------------------------------|----------------------------------------------------------------------------------------------------------------------------------------------------|---|
|                                                   | Health Professionals<br>Follow-up Study<br>(HPFS)                              | adenomas<br>7 years of follow-up                                                      | questionnaire<br><br>Charred database<br><br>highest vs. lowest<br>quintile                                                              | MeIQx (median ng/day)<br>1.5 vs. 35<br>DiMeIQx (median ng/day)<br>0 vs. 4.0<br>MDM (median rev/day)<br>711 vs. 8125                                                                                                                                                                        | Colon: 1.28 (0.95-1.71)<br><br>Colon: 1.08 (0.86-1.37)<br><br>Colon: 1.29 (0.97-1.72)                                                                                                                                                                                                                                                                                                                                                                                                                                                          | for endoscopy, negative<br>endoscopy before 1996,<br>physical activity,<br>smoking, race, aspirin,<br>total energy intake,<br>calcium, folate      |   |
| Shin, 2007 [35]<br>USA<br>Nashville,<br>Tennessee | Population-based<br>Case-control<br><br>Tennessee<br>Colorectal Polyp<br>Study | 573 adenomatous polyps<br>(59.6±7.5 y)<br>1544 controls<br>(57.3±7.8 y)               | Telephone interview<br>intake frequencies, and<br>portion size of 11 meats<br><br>Charred database<br><br>highest vs. lowest<br>quartile | PhIP (ng/day)<br>0-78.6 vs. 357.6-3128.9<br>MeIQx (ng/day)<br>0-15.3 vs. 84.0-846.8<br>DiMeIQx (ng/day)<br>0-1.03 vs. 7.05-106.3<br>B(a)P (ng/day)<br>0-9.84 vs. 82.67-910.7<br>MDM (rev/day)<br>0-3963 vs. 14184-334481                                                                   | Colon: 1.1 (0.8-1.4)<br><br>Colon: 0.9 (0.7-1.2)<br><br>Colon: 1.1 (0.8-1.4)<br><br>Colon: 0.9 (0.7-1.3)<br><br>Colon: 1.0 (0.8-1.4)                                                                                                                                                                                                                                                                                                                                                                                                           | Age, sex, study sites,<br>education, indications for<br>colonoscopy, smoking,<br>alcohol, BMI, physical<br>activity, NSAID, total<br>energy intake | 7 |
| Martinez, 2007<br>[36]<br>USA<br>Arizona          | Cohort study<br><br>Ursodeoxycholic<br>acid (UDCA) trial                       | 869 cohort<br>379 colorectal adenoma<br>recurrence<br><br>31 months of follow-up      | Arizona FFQ<br><br>Arizona Cancer Center<br>Meat Preparation<br>Questionnaire<br><br>Charred database<br><br>highest vs. lowest tertile  | PhIP (ng/day)<br>0-27.9 vs. 90-1406.9<br>MeIQx (ng/day)<br>0-10.7 vs. 30.7-403.9<br>DiMeIQx (ng/day)<br>0-0.5 vs. 2.1-50.0<br>B(a)P (ng/day)<br>0-2.5 vs. 34.3-361.0<br>MDM (rev/day)<br>0-1710 vs. 4390-136556                                                                            | Colorectal: 0.97 (0.68-1.39)<br><br>Colorectal: 1.32 (0.93-1.88)<br><br>Colorectal: 1.37 (0.96-1.94)<br><br>Colorectal: 0.86 (0.60-1.24)<br><br>Colorectal: 1.23 (0.86-1.75)                                                                                                                                                                                                                                                                                                                                                                   | Age, sex, previous polyps<br>and number of<br>colonoscopies during<br>follow-up                                                                    | 7 |
| Shin, 2008 [37]<br>USA<br>Nashville,<br>Tennessee | Population-based<br>Case-control<br><br>Tennessee<br>Colorectal Polyp<br>Study | 557 colorectal<br>adenomatous polyps<br>(59.6±7.5 y)<br>1493 controls<br>(57.2±7.8 y) | Telephone interview<br>intake frequencies, and<br>portion size of 11 meats<br><br>Charred database<br><br>10% increment of intake        | PhIP (median, ng/day)<br>Men: 193.0<br>Women: 178.4<br><br>MeIQx (median, ng/day)<br>Men: 51.9<br>Women: 29.9<br><br>DiMeIQx (median, ng/day)<br>Men: 3.5<br>Women: 2.7<br><br>B(a)P (median, ng/day)<br>Men: 37.3<br>Women: 24.9<br><br>MDM (median, rev/day)<br>Men: 8376<br>Women: 6607 | Colorectal<br>Low risk: 0.99 (0.93-1.04)<br>Int. risk: 1.02 (0.97-1.08)<br>High risk: 1.01 (0.91-1.12)<br>Colorectal<br>Low risk: 1.01 (0.95-1.07)<br>Int. risk: 0.98 (0.92-1.04)<br>High risk: 1.06 (0.94-1.19)<br>Colorectal<br>Low risk: 0.98 (0.93-1.04)<br>Int. risk: 1.01 (0.95-1.07)<br>High risk: 1.04 (0.93-1.15)<br>Colorectal<br>Low risk: 1.02 (0.96-1.07)<br>Int. risk: 0.97 (0.91-1.03)<br>High risk: 1.01 (0.91-1.12)<br>Colorectal<br>Low risk: 0.98 (0.93-1.04)<br>Int. risk: 0.99 (0.93-1.05)<br>High risk: 1.04 (0.94-1.15) | Age, sex, study site,<br>education, indication for<br>colonoscopy, smoking,<br>alcohol, physical activity,<br>and regular NSAID use                | 7 |
| Rohrmann, 2009<br>[38]<br>Europe                  | Cohort study<br><br>EPIC–Heidelberg                                            | 25540 cohort<br>516 incident colorectal<br>adenomas                                   | FFQ<br>Questions on meat<br>preparation methods and                                                                                      | PhIP (ng/day)<br><6.5 vs. ≥ 41.4                                                                                                                                                                                                                                                           | Colon: 1.56 (1.12-2.19)<br>Rectal: 1.08 (0.62-1.86)<br>Colorectal: 1.47 (1.13-1.93)                                                                                                                                                                                                                                                                                                                                                                                                                                                            | Age, sex, energy intake,<br>ethanol, milk and milk<br>product consumption,                                                                         | 7 |

|                                                                                                                                                                                                 |                                                                                                                                                            |                                                                            |                                                                                                                                                  |                                                                                                                                                                                                                                                                                    |                                                                                                                                                                                                                                                                                                                          |                                                                                                                                                                                                                       |   |
|-------------------------------------------------------------------------------------------------------------------------------------------------------------------------------------------------|------------------------------------------------------------------------------------------------------------------------------------------------------------|----------------------------------------------------------------------------|--------------------------------------------------------------------------------------------------------------------------------------------------|------------------------------------------------------------------------------------------------------------------------------------------------------------------------------------------------------------------------------------------------------------------------------------|--------------------------------------------------------------------------------------------------------------------------------------------------------------------------------------------------------------------------------------------------------------------------------------------------------------------------|-----------------------------------------------------------------------------------------------------------------------------------------------------------------------------------------------------------------------|---|
| Germany                                                                                                                                                                                         |                                                                                                                                                            | (52.9±7.6 y)<br><br>3966 negative result from colonoscopy (55.1±6.2 y)     | preferred degree of browning<br><br>highest vs. lowest quartile                                                                                  | MeIQx (ng/day)<br><3.8 vs. ≥19.9<br><br>DiMeIQx (ng/day)<br>0.5 vs. ≥3.8                                                                                                                                                                                                           | Colorectal: 1.27 (0.97-1.68)<br><br>Colorectal: 1.18 (0.92-1.53)                                                                                                                                                                                                                                                         | fiber, BMI, family history of colorectal cancer, physical activity, NSAID, smoking, education                                                                                                                         |   |
| Ferrucci, 2009 [39]<br>USA<br>Multi-center:<br>Bethesda, Maryland;<br>Washington, D.C.;<br>San Diego, California;<br>Portsmouth, Virginia                                                       | Population-based Case-control<br><br>CONCeRN (COlorectal Neoplasia screening with Colonoscopy in asymptomatic women at Regional Navy/army medical centers) | 158 colorectal adenoma (60.2±9.0 y)<br><br>649 controls (57.2 ± 7.6 y)     | 124 food items DHQ <sup>11</sup> meat cooking module as part of the RFQ <sup>12</sup><br><br>Charred database<br><br>highest vs. lowest quartile | PhIP (Median, ng/day)<br>4.5 (≤9) vs. 139.1 (>68.1)<br>MeIQx (Median, ng/day)<br>1.9 (≤3.7) vs. 27.9 (>18.2)<br>DiMeIQx (Median, ng/day)<br>0 (≤0.1) vs. 2.1 (>1.1)<br>B(a)P (Median, ng/day)<br>0.4 (≤1.6) vs. 47.1 (>22.2)<br>MDM (median rev/day)<br>260 (≤568) vs. 5654(>3162) | Colorectal: 1.49 (0.85-2.62)<br><br>Colorectal: 1.9 (1.05-3.42)<br><br>Colorectal: 1.21 (0.69-2.13)<br><br>Colorectal: 1.16 (0.67-2.00)<br><br>Colorectal: 1.69 (0.94-3.04)                                                                                                                                              | Age, education, race, smoking, physical activity, BMI, study center, current HRT use, family history of colorectal polyps or cancer, NSAID, alcohol, fiber, calcium, calcium from supplements, total caloric intake   | 8 |
| Wang, 2010 [67]<br>USA<br>Oahu, Hawaii                                                                                                                                                          | Population-based Case-control<br><br>PLCO (Prostate, Lung, Colorectal, and Ovarian Cancer Screening Trial)                                                 | 914 adenoma cases<br>61 (55-68) y<br>1185 controls<br>62 (56-68) y         | >200-item FFQ meet module: degree of doneness for various meats cooked with high-temperature methods<br><br>highest vs. lowest tertile           | Total HCAs (ng/day)<br><42 vs. >139<br>PhIP (ng/day)<br><25 vs. >91<br>MeIQx (ng/day)<br><8 vs. >40<br>DiMeIQx (ng/day)<br>0.25 vs. >2.0                                                                                                                                           | Colorectal: 1.23 (0.95-1.59)<br><br>Colorectal: 1.26 (0.98-1.62)<br><br>Colorectal: 1.19 (0.92-1.54)<br><br>Colorectal: 1.37 (1.08-1.75)                                                                                                                                                                                 | Age, sex, ethnicity, energy intake, physical activity, recruitment site and examination procedure, BMI, smoking, alcohol, folate, aspirin, years of schooling, calcium and non-starch polysaccharides from vegetables | 8 |
| Fu, 2011 [40]*<br>USA<br>Nashville, Tennessee                                                                                                                                                   | Population-based case-control study<br><br>Tennessee Colorectal Polyp Study                                                                                | 1881 adenoma cases<br>56.8±7.7 y<br>3764 controls<br>58.5±7.3 y            | Telephone interview intake frequencies, and portion size of 11 meats<br><br>Charred database<br><br>highest vs. lowest quartile                  | PhIP (ng/day)<br>≤73.3 vs. ≥339.4<br>MeIQx (ng/day)<br>≤12.2 vs. ≥70.1<br>DiMeIQx (ng/day)<br>≤0.82 vs. ≥5.96<br>B(a)P (ng/day)<br>≤8.93 vs. ≥79.9<br>MDM (rev/day)<br>≤2556 vs. ≥11021                                                                                            | Colorectal: 1.3 (1.1-1.5)<br><br>Colorectal: 1.4 (1.2-1.7)<br><br>Colorectal: 1.3 (1.1-1.6)<br><br>Colorectal: 1.1 (1.0-1.5)<br><br>Colorectal: 1.3 (1.1-1.6)                                                                                                                                                            | Age, sex, race, study sites, educational attainment, indications for colonoscopy, smoking, alcohol, BMI, physical activity, NSAID, total energy intake, recruitment before or after colonoscopy                       | 7 |
| Ferrucci, 2012 [41]<br>USA<br>Multi-center:<br>Birmingham, AL;<br>Denver, CO;<br>Detroit, MI;<br>Honolulu, HI;<br>Marshfield, WI;<br>Minneapolis, MN;<br>Pittsburgh, PA;<br>Salt Lake City, UT; | Cohort study<br><br>PLCO (Prostate, Lung, Colorectal, and Ovarian Cancer Screening Trial)                                                                  | 17072 cohort<br>1008 incident distal adenoma<br><br>3-5 years of follow-up | 137-items FFQ<br><br>Meat-cooking methods and doneness were included in the FFQ<br><br>Charred database<br><br>highest vs. lowest quartile       | PhIP (median, ng/day)<br>10.8 vs. 234.5<br><br>MeIQx (median ng/day)<br>4.8 vs. 62.5<br><br>DiMeIQx (median ng/day)<br>0 vs. 3.8<br><br>B(a)P (median ng/day)<br>0.5 vs. 79.0                                                                                                      | Colon: 1.07 (0.85-1.36)<br>Rectal: 1.75 (1.17-2.64)<br>Colorectal: 1.18 (0.96-1.45)<br>Colon: 0.97 (0.76-1.24)<br>Rectal: 1.12 (0.74-1.72)<br>Colorectal: 0.99 (0.80-1.23)<br>Colon: 0.89 (0.72-1.11)<br>Rectal: 1.20 (0.82-1.74)<br>Colorectal: 0.99 (0.82-1.20)<br>Colon: 0.92 (0.74-1.15)<br>Rectal: 1.53 (1.06-2.20) | Age, sex, study centre, ethnicity, education, family history of colorectal cancer, BMI, NSAID, physical activity, smoking, dietary calcium, supplemental calcium, dietary fibre, total energy intake                  | 8 |

|                                                                                                                                                                                                                                    |                                                                                                                         |                                                                                                                                                                          |                                                                                                                                          |                                                                                                                                                                          |                                                                                                                                                                                                                                                                                  |                                                                                                                                                                                                                                       |   |
|------------------------------------------------------------------------------------------------------------------------------------------------------------------------------------------------------------------------------------|-------------------------------------------------------------------------------------------------------------------------|--------------------------------------------------------------------------------------------------------------------------------------------------------------------------|------------------------------------------------------------------------------------------------------------------------------------------|--------------------------------------------------------------------------------------------------------------------------------------------------------------------------|----------------------------------------------------------------------------------------------------------------------------------------------------------------------------------------------------------------------------------------------------------------------------------|---------------------------------------------------------------------------------------------------------------------------------------------------------------------------------------------------------------------------------------|---|
| St. Louis, MO;<br>Washington, DC                                                                                                                                                                                                   |                                                                                                                         |                                                                                                                                                                          |                                                                                                                                          | MDM (median rev/day)<br>692 vs. 9902                                                                                                                                     | Colorectal: 1.06 (0.88-1.29)<br>Colon: 0.96 (0.76-1.22)<br>Rectal: 1.57 (1.03-2.40)<br>Colorectal: 1.06 (0.86-1.31)                                                                                                                                                              |                                                                                                                                                                                                                                       |   |
| Gilsing, 2012 [68]<br>USA<br>Multi-center:<br>Birmingham, AL;<br>Denver, CO;<br>Detroit, MI;<br>Honolulu, HI;<br>Marshfield, WI;<br>Minneapolis, MN;<br>Pittsburgh, PA;<br>Salt Lake City, UT;<br>St. Louis, MO;<br>Washington, DC | Population-based<br>Nested Case-control                                                                                 | 1205 adenoma cases<br>1386 controls                                                                                                                                      | 137-items FFQ<br>with detailed meat-<br>cooking module<br><br>Charred database<br><br>highest vs. lowest tertile                         | PhIP (ng/day)<br><42.41 vs. >165.0<br>MeIQx (ng/day)<br><14.99 vs. >49.44<br>DiMeIQx (ng/day)<br><0.57 vs. >2.84<br>B(a)P (ng/day)<br><2.96 vs. >42.85                   | Colorectal: 0.99 (0.78-1.25)<br><br>Colorectal: 0.98 (0.76-1.27)<br><br>Colorectal: 0.99 (0.79-1.25)<br><br>Colorectal: 1.07 (0.86-1.34)                                                                                                                                         | Age, sex, ethnicity, study<br>center, BMI, education,<br>smoking, physical<br>activity, total energy<br>intake, alcohol, fiber,<br>dietary calcium, regular<br>use of aspirin or<br>ibuprofen, family history<br>of colorectal cancer | 8 |
| Voutsinas, 2013<br>[42]<br>USA<br>Hawaii                                                                                                                                                                                           | Population-based<br>Case-control<br><br>PLCO (Prostate,<br>Lung, Colorectal,<br>and Ovarian Cancer<br>Screening Trial)  | Colorectal adenoma<br>Men: 599<br>59.9 (54.2–66.0) y<br>Women: 365<br>59.8 (54.1–66.8)<br>Controls<br>Men: 800<br>59.9 (54.5–66.2) y<br>Women: 466<br>60.7 (54.8–67.5) y | 268-items FFQ<br><br>highest vs. lowest tertile                                                                                          | Total HCAs (mean ng/day)<br><89.1 vs. >237<br><br>PhIP (mean ng/day)<br><49 vs. >140<br><br>MeIQx (mean ng/day)<br><22.4 vs. >82.1                                       | Colorectal<br>Men: 1.01 (0.74-1.38)<br>Women: 1.17 (0.79-1.71)<br>Colorectal<br>Men: 1.10 (0.81-1.48)<br>Women: 1.31 (0.90-1.90)<br>Colorectal<br>Men: 0.91 (0.66-1.25)<br>Women: 1.15 (0.76-1.74)                                                                               | Sex, age, race/ethnicity,<br>initial examination<br>modality, clinic and date<br>of screening, family<br>history of colorectal<br>cancer, BMI, fibre,<br>calcium, folate, smoking,<br>alcohol                                         | 8 |
| Barbir, 2012 [43]<br>Europe<br>Germany                                                                                                                                                                                             | Population-based<br>Case-control<br><br>European<br>Prospective<br>Investigation Cancer<br>Nutrition<br>EPIC–Heidelberg | 413 colorectal adenoma<br>cases<br>54.5±6.20 y<br>796 controls<br>54.6±6.24 y                                                                                            | 158-items FFQ<br><br>information on degree of<br>browning and cooking<br>methods<br><br>highest vs. lowest<br>quartile                   | PhIP (ng/day)<br>0-6.72 vs. >42.31<br>MeIQx (ng/day)<br>0-3.77 vs. >18.96<br>DiMeIQx (ng/day)<br>0-0.58 vs. >3.7                                                         | Colorectal: 1.81 (1.24-2.64)<br><br>Colorectal: 1.45 (0.99-2.12)<br><br>Colorectal: 1.35 (0.94-1.93)                                                                                                                                                                             | Age, sex, recruitment<br>year, NSAIDs, family<br>history of colorectal<br>cancer, smoking, waist<br>circumference,<br>alcohol, fat                                                                                                    | 7 |
| Fu, 2012 [44]**<br>USA<br>Nashville,<br>Tennessee                                                                                                                                                                                  | Population-based<br>case-control study<br><br>Tennessee Colorectal<br>Polyp Study                                       | 1527 colorectal adenoma<br>cases<br>56.8±7.64 y<br>3329 Controls<br>58.8±7.2 y                                                                                           | Telephone interview<br>intake frequencies, and<br>portion size of 11 meats<br><br>Charred database<br><br>highest vs. lowest<br>quartile | PhIP (ng/day)<br>Doses not reported<br><br>MeIQx (ng/day)<br>Doses not reported<br><br>DiMeIQx (ng/day)<br>Doses not reported<br><br>MDM (rev/day)<br>Doses not reported | Colorectal<br>Low risk: 1.2 (0.9-1.5)<br>High risk: 1.5 (1.1-2.0)<br>Colorectal<br>Low risk: 1.2 (0.9-1.5)<br>High risk: 1.6 (1.2-2.2)<br>Colorectal<br>Low risk: 1.3 (1.0-1.6)<br>High risk: 1.4 (1.1-1.9)<br>Colorectal<br>Low risk: 1.2 (1.0-1.6)<br>High risk: 1.6 (1.2-2.2) | Age, sex, study site,<br>educational attainment,<br>smoking, alcohol, BMI,<br>physical activity,<br>NSAIDs, total energy<br>intake, year of<br>recruitment, and<br>recruitment before or after<br>colonoscopy                         | 7 |
| Ho, 2014 [45]                                                                                                                                                                                                                      | Hospital-based case–                                                                                                    | Colorectal adenoma                                                                                                                                                       | Self-administered                                                                                                                        | PhIP (ng/day)                                                                                                                                                            | Colorectal                                                                                                                                                                                                                                                                       | Sex, smoking, fruit and                                                                                                                                                                                                               | 6 |

|                                            |                                                                                 |                                                                                                                             |                                                                                                                             |                                                                                                                                                                                                                                                                                            |                                                                                                                                                                                                                                                                      |                                                                                                                                                                                                                                       |
|--------------------------------------------|---------------------------------------------------------------------------------|-----------------------------------------------------------------------------------------------------------------------------|-----------------------------------------------------------------------------------------------------------------------------|--------------------------------------------------------------------------------------------------------------------------------------------------------------------------------------------------------------------------------------------------------------------------------------------|----------------------------------------------------------------------------------------------------------------------------------------------------------------------------------------------------------------------------------------------------------------------|---------------------------------------------------------------------------------------------------------------------------------------------------------------------------------------------------------------------------------------|
| Canada<br>Kingston, Ontario                | control study                                                                   | cases<br>Men: 78<br>Women: 45<br>Controls<br>Men: 65<br>Women: 148                                                          | questionnaire<br>Meat consumption<br>questionnaire<br>module<br><br>Charred database<br><br>highest vs. lowest<br>quartile  | ≤116.3 vs. >348.92<br><br>MeIQx (ng/day)<br>≤18.54 vs. >55.64<br><br>DiMeIQx (ng/day)<br>≤2.06 vs. >6.19<br><br>MDM (rev/day)<br>≤3590 vs. >1069                                                                                                                                           | Men: 2.14 (0.74-6.51)<br>Women: 0.56 (0.23-1.38)<br>Colorectal<br>Men: 1.67 (0.63-4.51)<br>Women: 0.94 (0.34-2.55)<br>Colorectal<br>Men: 1.98 (0.73-5.37)<br>Women: 0.68 (0.26-1.79)<br>Colorectal<br>Men: 2.58 (0.84-7.94)<br>Women: 0.63 (0.23-1.71)               | vegetable intake, dietary<br>fiber intake and<br>biomarker levels of<br>albumin and folate                                                                                                                                            |
| Budhathoki, 2015<br>[46]<br>Japan<br>Tokyo | Population-based<br>case-control study<br><br>Tokyo Colorectal<br>Adenoma Study | Adenoma cases<br>Men 498<br>61.3±5.9 y<br>Women 240<br>59.8±6.6<br>Controls<br>Men 453<br>60.0±5.7<br>Women 244<br>59.6±6.4 | 138-items FFQ<br><br>Meat-cooking methods<br>and doneness were<br>included in the FFQ<br><br>highest vs. lowest<br>quartile | Total HCAs (median<br>ng/day)<br>Men 12.3 vs. 53.6<br>Women 12.7 vs. 54.3<br>PhIP (median ng/day)<br>Men 7.4 vs. 33.4<br>Women 7.5 vs. 33.4<br>MeIQx (median ng/day)<br>Men 1.8 vs. 7.4<br>Women 2.2 vs. 7.0<br>MeIQ <sup>13</sup> (median ng/day)<br>Men 1.5 vs. 6.2<br>Women 1.6 vs. 6.0 | Colorectal<br>Men: 1.02 (0.69-1.50)<br>Women: 1.73 (0.99-3.01)<br>Colorectal<br>Men: 1.02 (0.69-1.50)<br>Women: 1.43 (0.83-2.45)<br>Colorectal<br>Men: 1.01 (0.68-1.50)<br>Women: 1.58 (0.92-2.73)<br>Colorectal<br>Men: 0.94 (0.64-1.37)<br>Women: 2.10 (1.20-3.67) | Age, screening period,<br>smoking, alcohol, BMI,<br>physical activity, family<br>history of colorectal<br>cancer, NSAIDs. Further<br>adjusted for age at<br>menarche, menopausal<br>status, and current use of<br>hormones in females |

<sup>1</sup>Quality score; <sup>2</sup>Food frequency questionnaire; <sup>3</sup>2-amino-1-methyl-6-phenylimidazo[4,5-b]pyridine; <sup>4</sup>2-amino-3,8-dimethyl imidazo [4,5-f]quinoxaline; <sup>5</sup>2-amino-3,4,8-trimethylimidazo[4,5-f]quinoxaline; <sup>6</sup>Meat-derived mutagenicity; <sup>7</sup>Nonsteroidal anti-inflammatory drugs; <sup>8</sup>Benzo(a)pyrene; <sup>9</sup>Body mass index; <sup>10</sup>On line database containing data on heterocyclic amines and MDM: <http://charred.cancer.gov/>; <sup>11</sup>Diet history questionnaire; <sup>12</sup>Risk factor questionnaire; <sup>13</sup>2-amino-3,4-dimethylimidazo[4,5-f]quinoline

\*Extension of Shin, 2007 [35].\*\*Subjects selected from the same population of Fu, 2011 [39].

**Supplemental Table S2.** Methodological quality of case-control studies included in the meta-analysis\*

| First author,<br>publication year<br>(reference) | Adequate<br>definition<br>of cases | Representativeness<br>of cases | Selection<br>of control<br>subjects | Definition of<br>control<br>subjects | Control for<br>important factor<br>or additional<br>factor† | Exposure<br>assessment | Same method of<br>ascertainment<br>for all subjects | Non response<br>Rate‡ | Total quality<br>scores |
|--------------------------------------------------|------------------------------------|--------------------------------|-------------------------------------|--------------------------------------|-------------------------------------------------------------|------------------------|-----------------------------------------------------|-----------------------|-------------------------|
| <b>ADENOMA</b>                                   |                                    |                                |                                     |                                      |                                                             |                        |                                                     |                       |                         |
| Sinha, 2001 [30]                                 | ★                                  | ★                              | ---                                 | ★                                    | ★ ★                                                         | ★                      | ★                                                   | ---                   | 7                       |
| Gunter, 2005 [31]                                | ★                                  | ★                              | ★                                   | ★                                    | ★ ★                                                         | ★                      | ★                                                   | ★                     | 9                       |
| Sinha, 2005 [32]                                 | ★                                  | ★                              | ★                                   | ★                                    | ★ ★                                                         | ★                      | ★                                                   | ---                   | 8                       |
| Sinha, 2005 [33]                                 | ★                                  | ★                              | ---                                 | ★                                    | ★ ★                                                         | ★                      | ★                                                   | ---                   | 7                       |
| Shin, 2007 [35]                                  | ★                                  | ★                              | ★                                   | ★                                    | ★ ★                                                         | ---                    | ★                                                   | ---                   | 7                       |
| Shin, 2008 [37]                                  | ★                                  | ★                              | ★                                   | ★                                    | ★ ★                                                         | ---                    | ★                                                   | ---                   | 7                       |
| Ferrucci, 2009 [39]                              | ★                                  | ★                              | ★                                   | ★                                    | ★ ★                                                         | ---                    | ★                                                   | ★                     | 8                       |
| Fu, 2011 [40]                                    | ★                                  | ★                              | ★                                   | ★                                    | ★ ★                                                         | ---                    | ★                                                   | ---                   | 7                       |
| Voutsinas, 2013 [42]                             | ★                                  | ★                              | ★                                   | ★                                    | ★ ★                                                         | ---                    | ★                                                   | ★                     | 8                       |
| Barbir, 2012 [43]                                | ★                                  | ★                              | ★                                   | ★                                    | ★ ★                                                         | ---                    | ★                                                   | ---                   | 7                       |
| Fu, 2012 [44]                                    | ★                                  | ★                              | ★                                   | ★                                    | ★ ★                                                         | ---                    | ★                                                   | ---                   | 7                       |
| Ho, 2014 [45]                                    | ★                                  | ★                              | ---                                 | ★                                    | ★ ★                                                         | ---                    | ★                                                   | ---                   | 6                       |
| Budhathoki, 2015 [46]                            | ★                                  | ★                              | ★                                   | ★                                    | ★ ★                                                         | ---                    | ★                                                   | ---                   | 7                       |
| <b>CANCER</b>                                    |                                    |                                |                                     |                                      |                                                             |                        |                                                     |                       |                         |
| De Stefani, 1997 [47]                            | ★                                  | ★                              | ---                                 | ★                                    | ★                                                           | ★                      | ★                                                   | ---                   | 6                       |
| Augustsson, 1999 [48]                            | ★                                  | ★                              | ★                                   | ★                                    | ★                                                           | ---                    | ★                                                   | ---                   | 6                       |
| Kampman, 1999 [49]                               | ★                                  | ★                              | ★                                   | ★                                    | ★ ★                                                         | ★                      | ★                                                   | ---                   | 8                       |
| Nowell, 2002 [50]                                | ★                                  | ★                              | ★                                   | ★                                    | ★                                                           | ★                      | ★                                                   | ---                   | 7                       |
| Le Marchand, 2002 [51]                           | ★                                  | ★                              | ★                                   | ★                                    | ★ ★                                                         | ★                      | ★                                                   | ---                   | 8                       |
| Butler, 2003 [52]                                | ★                                  | ★                              | ★                                   | ★                                    | ★                                                           | ★                      | ★                                                   | ---                   | 7                       |
| Murtaugh, 2004 [53]                              | ★                                  | ★                              | ★                                   | ★                                    | ★ ★                                                         | ★                      | ★                                                   | ★                     | 9                       |
| Butler, 2005 [54]                                | ★                                  | ★                              | ★                                   | ★                                    | ★                                                           | ★                      | ★                                                   | ---                   | 7                       |
| Murtaugh, 2005 [55]                              | ★                                  | ★                              | ★                                   | ★                                    | ★ ★                                                         | ★                      | ★                                                   | ★                     | 9                       |
| Butler, 2008 [56]                                | ★                                  | ★                              | ★                                   | ★                                    | ★                                                           | ★                      | ★                                                   | ---                   | 7                       |
| Girard, 2008 [57]                                | ★                                  | ★                              | ★                                   | ★                                    | ★                                                           | ★                      | ★                                                   | ---                   | 7                       |
| Kobayashi, 2009 [58]                             | ★                                  | ★                              | ---                                 | ★                                    | ★ ★                                                         | ---                    | ★                                                   | ★                     | 7                       |
| Nöthlings, 2009 [59]                             | ★                                  | ★                              | ★                                   | ★                                    | ★ ★                                                         | ---                    | ★                                                   | ---                   | 7                       |
| Miller, 2013 [62]                                | ★                                  | ★                              | ★                                   | ★                                    | ★ ★                                                         | ★                      | ★                                                   | ---                   | 8                       |
| Helmus, 2013 [63]                                | ★                                  | ★                              | ★                                   | ★                                    | ★ ★                                                         | ---                    | ★                                                   | ---                   | 7                       |
| Steck, 2014 [64]                                 | ★                                  | ★                              | ★                                   | ★                                    | ★                                                           | ★                      | ★                                                   | ---                   | 7                       |
| Joshi, 2015 [65]                                 | ★                                  | ★                              | ★                                   | ★                                    | ★ ★                                                         | ★                      | ★                                                   | ---                   | 8                       |
| <b>ADENOMA and CANCER</b>                        |                                    |                                |                                     |                                      |                                                             |                        |                                                     |                       |                         |
| Wang, 2010 [67]                                  | ★                                  | ★                              | ★                                   | ★                                    | ★ ★                                                         | ---                    | ★                                                   | ★                     | 8                       |
| Gilsing, 2012 [68]                               | ★                                  | ★                              | ★                                   | ★                                    | ★ ★                                                         | ---                    | ★                                                   | ★                     | 8                       |

\* A study could be awarded a maximum of one star for each item except for the item Control for important factor or additional factor.

† A maximum of 2 stars could be awarded for this item. Studies that controlled for age received one star, whereas studies that controlled for other important confounders (smoking and total energy intake) received an additional star.

‡ One star was assigned if there was no significant difference in the response rate between control subjects and cases by using the chi-square test ( $P > 0.05$ ).

**Supplemental Table S3.** Methodological quality of cohort studies included in the meta-analysis\*

| First author,<br>publication year<br>(reference) | Representativeness<br>of the exposed<br>cohort | Selection of the<br>unexposed<br>cohort | Ascertainment<br>of exposure | Outcome of<br>interest<br>not present<br>at start of study | Control for<br>important factor or<br>additional factor† | Assessment<br>of outcome | Follow-up<br>long enough for<br>outcomes<br>to occur ‡ | Adequacy of<br>follow-up<br>of cohorts § | Total quality<br>scores |
|--------------------------------------------------|------------------------------------------------|-----------------------------------------|------------------------------|------------------------------------------------------------|----------------------------------------------------------|--------------------------|--------------------------------------------------------|------------------------------------------|-------------------------|
| <b>ADENOMA</b>                                   |                                                |                                         |                              |                                                            |                                                          |                          |                                                        |                                          |                         |
| Wu, 2006 [34]                                    | ★                                              | ★                                       | ★                            | ★                                                          | ★ ★                                                      | ★                        | ★                                                      | ★                                        | 9                       |
| Martinez, 2008 [36]                              | ★                                              | ★                                       | ★                            | ★                                                          | ★                                                        | ★                        | ---                                                    | ---                                      | 7                       |
| Rohrmann, 2009 [38]                              | ★                                              | ★                                       | ★                            | ★                                                          | ★ ★                                                      | ★                        | ---                                                    | ---                                      | 7                       |
| Ferrucci, 2012 [41]                              | ★                                              | ★                                       | ★                            | ★                                                          | ★ ★                                                      | ★                        | ---                                                    | ★                                        | 8                       |
| <b>CANCER</b>                                    |                                                |                                         |                              |                                                            |                                                          |                          |                                                        |                                          |                         |
| Cross, 2010 [60]                                 | ★                                              | ★                                       | ---                          | ★                                                          | ★ ★                                                      | ★                        | ★                                                      | ★                                        | 8                       |
| Ollberding, 2012 [61]                            | ★                                              | ★                                       | ---                          | ★                                                          | ★ ★                                                      | ★                        | ★                                                      | ★                                        | 8                       |
| Le, 2016 [66]                                    | ★                                              | ★                                       | ★                            | ★                                                          | ★ ★                                                      | ★                        | ★                                                      | ★                                        | 8                       |

\* A study could be awarded a maximum of one star for each item except for the item Control for important factor or additional factor.

† A maximum of 2 stars could be awarded for this item. Studies that controlled for age received one star, whereas studies that controlled for other important confounders (smoking and total energy intake/BMI) received an additional star.

‡ A cohort study with a follow-up time >6 y was assigned one star.

§ A cohort study with a follow-up rate >75% was assigned one star.

**Supplemental Table S4.** Statistical analysis of dose-response trend by different models on adenoma and cancer risk.

|                       | Number<br>of<br>Studies | Model         | p            | I <sup>2</sup> % |
|-----------------------|-------------------------|---------------|--------------|------------------|
| <b><u>ADENOMA</u></b> |                         |               |              |                  |
| <b>PhIP</b>           | 9                       | Linear Fixed  | 0.047        | 70.5             |
|                       |                         | Linear Random | 0.081        | 70.5             |
|                       |                         | Cubic Spline  | 0.136        | 42.8             |
| <b>MelQx</b>          | 9                       | Linear Fixed  | 0.536        | 73.8             |
|                       |                         | Linear Random | 0.060        | 73.8             |
|                       |                         | Cubic Spline  | 0.036        | 30.1             |
| <b>DiMelQx</b>        | 9                       | Linear Fixed  | 0.226        | 48.7             |
|                       |                         | Linear Random | 0.066        | 48.7             |
|                       |                         | Cubic Spline  | 0.106        | 3.1              |
| <b>B(a)P</b>          | 5                       | Linear Fixed  | 0.519        | 57.1             |
|                       |                         | Linear Random | 0.291        | 57.1             |
|                       |                         | Cubic Spline  | 0.124        | 57.0             |
| <b>MDM</b>            | 5                       | Linear Fixed  | 0.371        | 79.8             |
|                       |                         | Linear Random | 0.102        | 79.8             |
|                       |                         | Cubic Spline  | 0.0001       | 39.0             |
| <b><u>CANCER</u></b>  |                         |               |              |                  |
| <b>PhIP</b>           | 8                       | Linear Fixed  | 0.481        | 15.0             |
|                       |                         | Linear Random | 0.481        | 15.0             |
|                       |                         | Cubic Spline  | Not possible |                  |
| <b>MelQx</b>          | 7                       | Linear Fixed  | 0.871        | 54.0             |
|                       |                         | Linear Random | 0.894        | 54.0             |
|                       |                         | Cubic Spline  | Not possible |                  |
| <b>DiMelQx</b>        | 6                       | Linear Fixed  | 0.526        | 0.0              |
|                       |                         | Linear Random | 0.632        | 0.0              |
|                       |                         | Cubic Spline  | 0.484        | 21.6             |
| <b>B(a)p</b>          | 2                       | Linear Fixed  | 0.753        | 0.0              |
|                       |                         | Linear Random | 0.753        | 0.0              |
|                       |                         | Cubic Spline  | 0.514        | 0.0              |
| <b>HCA</b>            | 4                       | Linear Fixed  | 0.161        | 0.0              |
|                       |                         | Linear Random | 0.161        | 0.0              |
|                       |                         | Cubic Spline  | 0.372        | 0.0              |



**Supplemental Table S5.** Characteristics of studies on HCAs, B(a)P and meat-derived mutagenic index intake in association with colorectal cancer (CRC) risk.

| Author, year<br>Location                          | Study design,<br>Study name      | Study population<br>Subjects (Age)<br>Cases/controls<br>Tumor site                                                                  | Exposure assessment<br>(comparisons)                                                                            | HCAs and B(a)P doses<br>Meat-derived<br>mutagenicity                                                                       | OR/RR (95% CI)                                                                                                                                                                                                                                                                                     | Matched or adjusted<br>variables                                                                                                                                         | QS <sup>†</sup> |
|---------------------------------------------------|----------------------------------|-------------------------------------------------------------------------------------------------------------------------------------|-----------------------------------------------------------------------------------------------------------------|----------------------------------------------------------------------------------------------------------------------------|----------------------------------------------------------------------------------------------------------------------------------------------------------------------------------------------------------------------------------------------------------------------------------------------------|--------------------------------------------------------------------------------------------------------------------------------------------------------------------------|-----------------|
| De Stefani, 1997 [47]<br>South America<br>Uruguay | Hospital-based<br>Case-control   | 250 colorectal cancer<br>500 controls                                                                                               | 60-items FFQ <sup>2</sup><br>Face to face interview<br><br>highest vs. lowest quartile                          | PhIP <sup>3</sup><br>≤2.71 vs. >3.39<br><br>MeIQx <sup>4</sup><br>≤1.27 vs. >1.83<br><br>IQ <sup>5</sup><br>≤0.46 vs. >1.6 | Colorectal: 1.87 (1.01-3.49)<br><br>Colorectal: 2.26 (1.16-4.42)<br><br>Colorectal: 1.95 (1.03-3.68)                                                                                                                                                                                               | Age, sex, residence,<br>education, family<br>history of colon cancer,<br>BMI <sup>6</sup> , vegetable intake,<br>total energy intake, total<br>mean and total fat intake | 6               |
| Augustsson, 1999 [48]<br>Europe<br>Sweden         | Population-based<br>Case-control | 352 colon cancer<br>(mean:67, range:51-77)<br>249 rectal cancer<br>(mean:67, range:51-77)<br>553 controls<br>(mean 67, range:51-76) | 188-items FFQ<br><br>postal and telephone<br>interview<br><br>highest vs. lowest quintile                       | Total HCAs<br><br>PhIP<br><br>MeIQx<br><br>DiMeIQx <sup>7</sup><br><br>IQ<br><br>MeIQ <sup>8</sup>                         | Colon: 0.6 (0.4-1.0)<br>Rectum: 0.7 (0.4-1.1)<br>Colon: 0.6 (0.4-0.9)<br>Rectum: 0.6 (0.4-1.1)<br>Colon: 0.6 (0.4-1.0)<br>Rectum: 0.7 (0.4-1.2)<br>Colon: 0.6 (0.4-0.9)<br>Rectum: 0.6 (0.4-1.1)<br>Colon: 1.1 (0.7-1.6)<br>Rectum: 0.8 (0.5-1.3)<br>Colon: 1.3 (0.9-1.8)<br>Rectum: 1.5 (1.0-2.1) | Age, sex and energy                                                                                                                                                      | 6               |
| Kampman, 1999 [49]<br>USA<br>California           | Population-based<br>Case-control | 1542 colon cancer<br>868 men, 674 women<br>1860 controls<br>989 men, 871 women                                                      | Interviewer-administered<br>questionnaire with over 800<br>food items listed<br><br>highest vs. lowest quartile | MDM <sup>9</sup>                                                                                                           | Colon<br>Men: 1.3 (1.0-1.7)<br>Women: 1.1 (0.8-1.4)                                                                                                                                                                                                                                                | Age, BMI, calories,<br>dietary fiber, lifetime<br>physical activity, and<br>usual no. of cigarettes<br>smoked                                                            | 8               |
| Nowell, 2002 [50]<br>USA<br>Arkansas, Tennessee   | Population-based<br>Case-control | 155 colorectal cancer<br>(mean 63.4, range: 33-87)<br>380 controls<br>(mean: 60.8, range 20-88)                                     | In-person interviews<br><br>highest vs. lowest quartile                                                         | MeIQx                                                                                                                      | Colorectal: 4.09 (1.94-9.08)                                                                                                                                                                                                                                                                       | Age, sex and ethnicity                                                                                                                                                   | 7               |
| Le Marchand, 2002<br>[51]<br>USA<br>Hawaii        | Population-based<br>Case-control | 289 colon cancer, men<br>137 rectal cancer, men<br>426 controls, men                                                                | FFQ<br>in-person interviews<br><br>highest vs. lowest tertile                                                   | Total HCAs<br><br>PhIP<br><br>MeIQx<br><br>DiMeIQx                                                                         | Colon: 1.0 (0.6-1.6)<br>Rectum: 2.2 (1.0-4.7)<br>Colon: 1.0 (0.6-1.6)<br>Rectum: 1.7 (0.3-3.8)<br>Colon: 1.0 (0.6-1.1)<br>Rectum: 3.1 (1.3-7.7)<br>Colon: 1.1 (0.7-1.7)<br>Rectum: 2.7 (1.1-6.3)                                                                                                   | Age, ethnicity, smoking,<br>physical activity, aspirin<br>use, BMI, education,<br>non-starch<br>polysaccharides from<br>vegetables and total<br>calcium                  | 8               |

|                                                |                                  |                                                                                                                      |                                                                                                                                                |                                                                                                                                                                                                                                                      |                                                                                                                                                                                                                                                                                                                                                                                                        |                                                                                                                                   |   |
|------------------------------------------------|----------------------------------|----------------------------------------------------------------------------------------------------------------------|------------------------------------------------------------------------------------------------------------------------------------------------|------------------------------------------------------------------------------------------------------------------------------------------------------------------------------------------------------------------------------------------------------|--------------------------------------------------------------------------------------------------------------------------------------------------------------------------------------------------------------------------------------------------------------------------------------------------------------------------------------------------------------------------------------------------------|-----------------------------------------------------------------------------------------------------------------------------------|---|
| Butler, 2003 [52]*<br>USA<br>North Carolina    | Population-based<br>Case-control | African-Americans<br>274 colon cancers<br>427 controls<br>Whites<br>346 colon cancers<br>611 controls<br>(mean 65 y) | 188-items FFQ<br>in-person interviews<br><br>highest vs. lowest quintile                                                                       | PhIP (median, ng/day)<br>0 vs. 218.5<br><br>MeIQx (median,<br>ng/day)<br>4.3 vs. 124.2<br><br>DiMeIQx (median,<br>ng/day)<br>0 vs. 10.3<br><br>B(a)P <sup>10</sup> (median,<br>ng/day)<br>0.5 vs. 78.2<br><br>MDM (median, rev/day)<br>800 vs. 17600 | African-Americans<br>Colon: 0.9 (0.4-1.9)<br>Whites<br>Colon: 1.1 (0.7-2.0)<br>African-Americans<br>Colon: 1.2 (0.5-3.2)<br>Whites<br>Colon: 1.2 (0.5-2.7)<br>African-Americans<br>Colon: 2.1 (0.9-5.1)<br>Whites<br>Colon: 1.3 (0.7-2.6)<br>African-Americans<br>Colon: 2.0 (1.1-3.6)<br>White<br>Colon: 1.1 (0.7-1.7)<br>African-Americans<br>Colon: 1.7 (0.9-3.1)<br>Whites<br>Colon: 1.2 (0.8-2.0) | Age, race, sex, energy-<br>adjusted fat intake,<br>energy intake, fiber<br>intake, and offsets.                                   | 7 |
| Murtaugh, 2004 [53]<br>USA<br>California, Utah | Population-based<br>Case-control | 559 rectal cancers, men<br>672 controls, men<br>393 rectal cancers,<br>women<br>532 controls, women                  | Recall diet history<br>in-person interviews                                                                                                    | MDM (median, rev/day)<br><351 vs. >988 (men)<br><390 vs. >1092<br>(women)                                                                                                                                                                            | Rectum<br>Men: 1.37 (0.98-1.92)<br>Women: 0.89 (0.60-1.31)                                                                                                                                                                                                                                                                                                                                             | Age, BMI, energy<br>intake, dietary fiber,<br>calcium, lifetime<br>physical activity, and<br>usual number of<br>cigarettes smoked | 9 |
| Butler, 2005 [54]*<br>USA<br>North Carolina    | Population-based<br>Case-control | 400 colon cancers<br>412 controls                                                                                    | 150-items FFQ<br>in-person interviews<br><br>Exposed group vs. reference<br>group (individuals with less<br>than the median dietary<br>intake) | PhIP (median, ng/day)<br><39.1 vs. ≥39.1<br>MeIQx (median,<br>ng/day)<br><36.7 vs. ≥36.7<br>DiMeIQx (median,<br>ng/day)<br><2.2 vs. ≥2.2<br>B(a)P (median, ng/day)<br><6.4 vs. ≥6.4                                                                  | Colon: 1.4 (1.0-1.9)<br><br>Colon: 0.9 (0.6-1.4)<br><br>Colon: 1.6 (1.1-2.3)<br><br>Colon: 1.0 (0.7-1.4)                                                                                                                                                                                                                                                                                               | Age, race, sex, total<br>meat, energy-adjusted<br>fat intake, dietary fiber<br>intake, total energy, and<br>offsets               | 7 |
| Murtaugh, 2005 [55]<br>USA<br>California, Utah | Population-based<br>Case-control | 1315 colorectal cancers,<br>men<br>1518 controls, men<br>983 colorectal cancers,<br>women<br>1231 controls, women    | Recall diet history<br>in-person interviews                                                                                                    | MDM (median, rev/day)<br>Red meat:<br>≤156 vs. >416 (men);<br>≤156 vs. >416 (women)<br>White meat:<br>≤156 vs. >351 (men)<br>≤208 vs. >468 (women)                                                                                                   | Colorectal - Red meat<br>Men: 1.05 (0.86-1.28)<br>Women: 0.96 (0.67-1.38)<br>Colorectal - White meat<br>Men: 1.31 (1.08-1.58)<br>Women: 0.94 (0.74-1.19)                                                                                                                                                                                                                                               | Age, BMI, energy<br>intake, dietary fiber,<br>calcium, lifetime<br>physical activity, and<br>usual number of<br>cigarettes smoked | 9 |

|                                                    |                                                                                        |                                                                                                     |                                                                                                                                                                                    |                                                                                                                                                                                                               |                                                                                                                                                                                                                                        |                                                                                                                                                                               |   |
|----------------------------------------------------|----------------------------------------------------------------------------------------|-----------------------------------------------------------------------------------------------------|------------------------------------------------------------------------------------------------------------------------------------------------------------------------------------|---------------------------------------------------------------------------------------------------------------------------------------------------------------------------------------------------------------|----------------------------------------------------------------------------------------------------------------------------------------------------------------------------------------------------------------------------------------|-------------------------------------------------------------------------------------------------------------------------------------------------------------------------------|---|
| Butler, 2008 [56]*<br>USA<br>North Carolina        | Population-based<br>Case-control                                                       | African-American<br>217 colon cancers<br>315 controls<br>White<br>290 colon cancers<br>534 controls | 150-items FFQ<br>in-person interviews<br><br>highest vs. lowest tertile                                                                                                            | PhIP (median, ng/day)<br>3.7 vs. 148.2<br><br>MeIQx (median,<br>ng/day)<br>8.0 vs. 90.8<br><br>DiMeIQx (median,<br>ng/day)<br>0.3 vs. 7.6                                                                     | African Americans<br>Colon: 1.3 (0.8-2.1)<br>White<br>Colon: 1.3 (0.9-2.0)<br>African Americans<br>Colon: 1.3 (0.8-2.3)<br>White<br>Colon: 1.4 (0.9-2.2)<br>African Americans<br>Colon: 1.7 (1.0-2.9)<br>White<br>Colon: 1.2 (0.8-1.8) | Age, race, sex, energy-<br>adjusted fat intake,<br>dietary fiber intake, total<br>energy, offsets, and<br>individual heterocyclic<br>amines                                   | 7 |
| Girard, 2008 [57]*<br>USA<br>North Carolina        | Population-based<br>Case-control                                                       | 537 colon cancers<br>866 controls                                                                   | 150-items FFQ<br>in-person interviews<br><br>High exposed group vs. low<br>exposed group (variable cut<br>points are median values<br>based on the distribution<br>among controls) | PhIP (median, ng/day)<br><45.9 vs. ≥45.9<br>MeIQx (median,<br>ng/day)<br><37.3 vs. ≥37.3<br>DiMeIQx (median,<br>ng/day)<br><2.4 vs. ≥2.4<br>B(a)P (median, ng/day)<br><7.7 vs. ≥7.7                           | Colon: 1.0 (0.7-1.3)<br><br>Colon: 1.2 (0.9-1.7)<br>Colon: 1.2 (0.9-1.7)<br><br>Colon: 1.1 (0.9-1.4)                                                                                                                                   | Age, race, sex, energy-<br>adjusted fat intake,<br>dietary fiber intake, total<br>energy, offsets, and all<br>heterocyclic amines                                             | 7 |
| Kobayashi, 2009 [58]<br>Japan<br>Nagano Prefecture | Hospital-based Case-<br>control                                                        | 117 colorectal cancer<br>(21-76 y, mean 59.7 y)<br>238 controls<br>(mean 59.6 y)                    | 144-items FFQ<br>self-administered<br><br>highest vs. lowest tertile                                                                                                               | Total HCAs (mean<br>ng/day)<br>21.7 vs. 123.8<br>PhIP (mean ng/day)<br>13.2 vs. 76.0<br>MeIQ (mean ng/day)<br>2.8 vs. 13.8<br>MeIQx (mean ng/day)<br>3.0 vs. 15.7                                             | Colorectal: 0.99 (0.21-4.81)<br>Colorectal: 1.32 (0.27-6.48)<br>Colorectal: 1.23 (0.23-6.64)<br>Colorectal: 1.98 (0.42-9.32)                                                                                                           | Smoking status, alcohol<br>intake family history of<br>colorectal cancer, body<br>mass index, JA<br>membership, and intake<br>of vegetables, meat,<br>fish, and dietary fiber | 7 |
| Nöthlings, 2009 [59]<br>USA<br>Hawaii–Los Angeles  | Cohort-based Case-<br>control<br><br>Hawaii–Los Angeles<br>Multiethnic<br>Cohort Study | 398 colorectal cancer<br>(62-74 y)<br>1444 controls<br>(60-72)                                      | >180-items FFQ<br>cooked meat module<br>self-administered<br><br>highest vs. lowest tertile                                                                                        | Total HCAs (ng/1000<br>kcal/day)<br>0-217.3 vs. >566.9<br>PhIP (ng/1000 kcal/day)<br>0-171.7 vs. >460.5<br>MeIQx (ng/1000<br>kcal/day)<br>0-29.8 vs. >93.5<br>DiMeIQx (ng/1000<br>kcal/day)<br>0-1.8 vs. >6.2 | Colorectal: 1.03 (0.77-1.39)<br>Colorectal: 1.03 (0.77-1.39)<br>Colorectal: 1.09 (0.81-1.47)<br>Colorectal: 1.18 (0.88-1.59)                                                                                                           | Sex, age, ethnicity,<br>family history of<br>colorectal cancer, BMI,<br>dietary fiber, calcium,<br>vitamin D, folic acid,<br>ethanol, meat, physical<br>activity, smoking     | 8 |

|                                                                                                                                      |                                                                                                                               |                                                                                                                                        |                                                                                                                                                                       |                                                                                                                                                                                                                                                                                  |                                                                                                                                                                                                                                                                                                                                                                                                                                                 |                                                                                                                                                                                                                                                                                                                          |   |
|--------------------------------------------------------------------------------------------------------------------------------------|-------------------------------------------------------------------------------------------------------------------------------|----------------------------------------------------------------------------------------------------------------------------------------|-----------------------------------------------------------------------------------------------------------------------------------------------------------------------|----------------------------------------------------------------------------------------------------------------------------------------------------------------------------------------------------------------------------------------------------------------------------------|-------------------------------------------------------------------------------------------------------------------------------------------------------------------------------------------------------------------------------------------------------------------------------------------------------------------------------------------------------------------------------------------------------------------------------------------------|--------------------------------------------------------------------------------------------------------------------------------------------------------------------------------------------------------------------------------------------------------------------------------------------------------------------------|---|
| Cross, 2010 [60]<br>USA<br>California, Florida,<br>Louisiana, New<br>Jersey, North Carolina,<br>Pennsylvania.<br>Atlanta and Detroit | Cohort study<br>NIH-AARP Diet and<br>Health Study                                                                             | 300,948 participants<br>175,369 men<br>125,579 women<br>50-71 y<br>7.2 years of follow-up<br>1,995 colon cancers<br>724 rectal cancers | 124-item FFQ<br>meat cooking module as<br>part of the RFQ <sup>11</sup><br>self-administered<br><br>Charred database <sup>12</sup><br><br>highest vs. lowest quintile | PhIP (median, ng/1000<br>kcal/day)<br>2.1 vs. 123.6<br>MeIQx (median,<br>ng/1000 kcal/day)<br>0.5 vs. 24.4<br>DiMeIQx (median,<br>ng/1000 kcal/day)<br>0 vs. 1.74<br>B(a)P (median, ng/1000<br>kcal/day)<br>0.21 vs. 43.97<br>MDM (median,<br>rev/1000 kcal/day)<br>165 vs. 4349 | Colon: 1.01 (0.87-1.16)<br>Rectum: 0.94 (0.73-1.20)<br>Colorectal: 0.99 (0.87-1.12)<br>Colon: 1.26 (1.09-1.45)<br>Rectum: 1.01 (0.79-1.28)<br>Colorectal: 1.19 (1.05-1.34)<br>Colon: 1.23 (1.10-1.39)<br>Rectum: 1.00 (0.81-1.22)<br>Colorectal: 1.17 (1.05-1.29)<br>Colon: 0.96 (0.83-1.11)<br>Rectum: 0.95 (0.75-1.19)<br>Colorectal: 0.96 (0.85-1.08)<br>Colon: 1.19 (1.03-1.38)<br>Rectum: 1.01 (0.79-1.29)<br>Colorectal: 1.14 (1.01-1.29) | Sex, education, BMI,<br>smoking, total energy,<br>fiber, and calcium                                                                                                                                                                                                                                                     | 8 |
| Wang, 2010 [67]<br>USA<br>Oahu                                                                                                       | Population-based<br>Case-control<br><br>Hawaii Surveillance,<br>Epidemiology and<br>End Results cancer<br>registry Controls   | 496 colorectal cancer<br>Median 66 y<br>607 controls<br>Median 67 y                                                                    | >200-item FFQ<br>meat module: degree of<br>doneness for various meats<br>cooked with high-<br>temperature methods<br><br>highest vs. lowest tertile                   | Total HCAs (mean<br>ng/day)<br><42 vs. >139<br>PhIP (mean ng/day)<br><25 vs. >91<br>MeIQx (mean ng/day)<br><8 vs. >40<br>DiMeIQx (mean<br>ng/day)<br>0.25 vs. >2.0                                                                                                               | Colorectal: 1.07 (0.76-1.51)<br><br>Colorectal: 1.20 (0.86-1.68)<br><br>Colorectal: 1.10 (0.78-1.54)<br><br>Colorectal: 0.99 (0.71-1.37)                                                                                                                                                                                                                                                                                                        | Age, sex, ethnicity,<br>energy intake, physical<br>activity, recruitment<br>site and<br>examination procedure,<br>BMI, smoking, alcohol,<br>folate, aspirin, years of<br>schooling, calcium and<br>non-starch<br>polysaccharides from<br>vegetables                                                                      | 8 |
| Ollberding, 2012 [61]<br>USA<br>California, Hawaii                                                                                   | Cohort study<br>Multiethnic Cohort<br>(MEC) Study                                                                             | 131,763 participants<br>45-75 y<br>8.1 years of follow up<br>1,757 colorectal cancer                                                   | Quantitative-FFQ<br>meat-cooking module<br><br>Charred database<br><br>highest vs. lowest quintile                                                                    | Total HCAs (median,<br>ng/1000 kcal/day)<br>43.82 vs. 1237.86<br>PhIP (median, ng/1000<br>kcal/day)<br>35.34 vs. 1027.3<br>MeIQx (median,<br>ng/1000 kcal/day)<br>3.09 vs. 208.18<br>DiMeIQx (median,<br>ng/1000 kcal/day)<br>0.15 vs. 16.75                                     | Colorectal: 0.90 (0.76-1.05)<br><br>Colorectal: 0.95 (0.81-1.11)<br><br>Colorectal: 1.01 (0.86-1.19)<br><br>Colorectal: 0.88 (0.75-1.03)                                                                                                                                                                                                                                                                                                        | Age, sex, ethnicity,<br>family history of<br>colorectal cancer and<br>polyp, BMI, smoking,<br>nonsteroidal anti-<br>inflammatory use,<br>alcohol, physical<br>activity, history of<br>diabetes, hormone<br>replacement therapy<br>(females only), total<br>calories, dietary fiber,<br>calcium, folate, and<br>vitamin D | 8 |
| Gilsing, 2012 [68]<br>USA<br>Multi-center:<br>Birmingham, AL;<br>Denver, CO;<br>Detroit, MI;<br>Honolulu, HI;                        | Population-based<br>Nested Case-control<br><br>PLCO (Prostate,<br>Lung, Colorectal,<br>and Ovarian Cancer<br>Screening Trial) | 364 colorectal cases<br>394 controls                                                                                                   | 137-items FFQ<br>with detailed meat-cooking<br>module<br><br>Charred database<br><br>highest vs. lowest tertile                                                       | PhIP (ng/day)<br><42.41 vs. >165.0<br>MeIQx (ng/day)<br><14.99 vs. >49.44<br>DiMeIQx (ng/day)<br><0.57 vs. >2.84<br>B(a)P (ng/day)                                                                                                                                               | Colorectal: 0.96 (0.63-1.46)<br><br>Colorectal: 0.63 (0.38-1.04)<br><br>Colorectal: 0.86 (0.56-1.34)<br><br>Colorectal: 1.03 (0.67-1.57)                                                                                                                                                                                                                                                                                                        | Age, sex, ethnicity,<br>study center, BMI,<br>education, smoking,<br>physical activity, total<br>energy intake, alcohol,<br>fiber, dietary calcium,<br>regular use of aspirin or                                                                                                                                         | 8 |

|                                                                                                                   |                                  |                                                                                                    |                                                                                                                                                                                       |                                                                                                                                                                                                                                                                                                      |                                                                                                                                                                                                                                                                                                                                                                                                                                                 |                                                                                                                                             |   |
|-------------------------------------------------------------------------------------------------------------------|----------------------------------|----------------------------------------------------------------------------------------------------|---------------------------------------------------------------------------------------------------------------------------------------------------------------------------------------|------------------------------------------------------------------------------------------------------------------------------------------------------------------------------------------------------------------------------------------------------------------------------------------------------|-------------------------------------------------------------------------------------------------------------------------------------------------------------------------------------------------------------------------------------------------------------------------------------------------------------------------------------------------------------------------------------------------------------------------------------------------|---------------------------------------------------------------------------------------------------------------------------------------------|---|
| Marshfield, WI;<br>Minneapolis, MN;<br>Pittsburgh, PA;<br>Salt Lake City, UT; St.<br>Louis, MO;<br>Washington, DC |                                  |                                                                                                    |                                                                                                                                                                                       | <2.96 vs. >42.85                                                                                                                                                                                                                                                                                     |                                                                                                                                                                                                                                                                                                                                                                                                                                                 | ibuprofen, family<br>history of colorectal<br>cancer                                                                                        |   |
| Miller, 2013 [62]<br>USA<br>Central and northeast<br>Pennsylvania                                                 | Population-based<br>Case-control | 989 colorectal cases<br>693 colon<br>289 rectal<br>mean 61.4 y<br><br>1033 controls<br>mean 66.5 y | 137 items FFQ- DHQ <sup>13</sup><br>in-person interviews<br><br>Charred database<br><br>highest vs. lowest quintile                                                                   | PhIP (median, ng/1000<br>kcal/day)<br><7.2 vs. >68.3<br>MeIQx (median,<br>ng/1000 kcal/day)<br><4.2 vs. >23.8<br>DiMeIQx (median,<br>ng/1000 kcal/day)<br><0.23 vs. >2.2<br>B(a)P (median, ng/1000<br>kcal/day)<br><0.32 vs. >19.0<br>MDM (median,<br>revertants/<br>1000kcal/day)<br><665 vs. >3995 | Colon: 0.95 (0.68-1.33)<br>Rectum: 1.33 (0.88-2.02)<br>Colorectal: 1.06 (0.79-1.43)<br>Colon: 1.23 (0.89-1.69)<br>Rectum: 1.24 (0.81-1.91)<br>Colorectal: 1.22 (0.91-1.64)<br>Colon: 1.32 (0.95-1.82)<br>Rectum: 1.54 (1.02-2.33)<br>Colorectal: 1.36 (1.02-1.82)<br>Colon: 0.77 (0.55-1.07)<br>Rectum: 1.26 (0.83-1.91)<br>Colorectal: 0.90 (0.67-1.21)<br>Colon: 0.99 (0.72-1.37)<br>Rectum: 1.23 (0.80-1.89)<br>Colorectal: 1.05 (0.78-1.41) | Age, sex, total energy<br>intake, smoking, BMI,<br>past regular NSAID <sup>14</sup><br>use, fruit and vegetable<br>consumption              | 8 |
| Helmus, 2013 [63]<br>USA<br>Kentucky                                                                              | Population-based<br>Case-control | 1062 colon cancer cases<br>mean 62.6 y<br>1645 controls<br>mean 61.4 y                             | 175 items FFQ<br>Meat Preparation<br>Questionnaire<br>self-administered<br><br>Charred database<br><br>highest vs. lowest quartile                                                    | PhIP<br>Doses not reported<br>MeIQx<br>Doses not reported<br>DiMeIQx<br>Doses not reported<br>B(a)P<br>Doses not reported                                                                                                                                                                            | Colon: 1.18 (0.91-1.52)<br><br>Colon: 1.87 (1.44-2.44)<br><br>Colon: 1.67 (1.29-2.17)<br><br>Colon: 0.87 (0.68-1.12)                                                                                                                                                                                                                                                                                                                            | Age, sex, race, waist-hip<br>ratio, average daily total<br>caloric intake, family<br>history of colorectal<br>cancer, smoking,<br>NSAID use | 7 |
| Steck, 2014 [64]*<br>USA<br>North Carolina                                                                        | Population-based<br>Case-control | 536 colon cancer cases<br>862 controls<br>mean 65 y                                                | 150-items FFQ<br>in-person interviews<br><br>High exposed group vs. low<br>exposed group (variable cut<br>points are median values<br>based on the distribution<br>among<br>controls) | PhIP (ng/day)<br><45.9 vs. ≥45.9<br>MeIQx (ng/day)<br><37.3 vs. ≥37.3<br>DiMeIQx (ng/day)<br><2.4 vs. ≥2.4<br>B(a)P (ng/day)<br><7.7 vs. ≥7.7                                                                                                                                                        | Colon: 1.1 (0.8-1.3)<br><br>Colon: 1.3 (1.0-1.7)<br><br>Colon: 1.3 (1.0-1.7)<br><br>Colon: 1.0 (0.8-1.3)                                                                                                                                                                                                                                                                                                                                        | Age, sex, race, offsets,<br>total energy intake,<br>energy-adjusted fat<br>intake, dietary fiber<br>intake, and other HCA<br>variables      | 7 |
| Joshi, 2015 [65]<br>Canada-USA<br><br>Ontario, Hawaii,<br>Southern California<br>Consortium                       | Population-based<br>Case-control | 3350 colorectal cases<br>mean 59.4 y<br>3504 controls<br>mean 57.8 y                               | >200-item FFQ<br>meat cooking module<br><br>Face-to-face interview,<br>Computer-Assisted<br>Telephone Interview<br>(CATI), or mail for self-<br>administration                        | Total HCAs (ng/1000<br>kcal/day)<br>0-82.04 vs. 387.97-<br>6166.49<br><br>PhIP ( ng/1000<br>kcal/day)<br>0-60.61 vs. 315.12-                                                                                                                                                                         | Colon: 1.0 (0.8-1.2)<br>Rectum: 0.8 (0.6-1.0)<br>Colorectal: 0.9 (0.8-1.1)<br><br>Colon: 1.0 (0.8-1.2)<br>Rectum: 0.9 (0.7-1.1)<br>Colorectal: 0.9 (0.8-1.1)                                                                                                                                                                                                                                                                                    | Age, sex, BMI, race,<br>saturated fat, dietary<br>fiber, center, vegetables,<br>physical<br>activity, total calorie<br>intake, smoking      | 8 |

|                      |                                                                                                                               |                                                                                                                                     |                                                                                                           |                                                                                                                                                                                                                                                                              |                                                                                                                                                                                                                                                                                          |                                                                                                                                                                                                                                              |
|----------------------|-------------------------------------------------------------------------------------------------------------------------------|-------------------------------------------------------------------------------------------------------------------------------------|-----------------------------------------------------------------------------------------------------------|------------------------------------------------------------------------------------------------------------------------------------------------------------------------------------------------------------------------------------------------------------------------------|------------------------------------------------------------------------------------------------------------------------------------------------------------------------------------------------------------------------------------------------------------------------------------------|----------------------------------------------------------------------------------------------------------------------------------------------------------------------------------------------------------------------------------------------|
|                      |                                                                                                                               |                                                                                                                                     |                                                                                                           | 4922.97                                                                                                                                                                                                                                                                      | Colon: 1.1 (0.9-1.3)<br>Rectum: 0.9 (0.7-1.2)<br>Colorectal: 1.0 (0.9-1.2)                                                                                                                                                                                                               |                                                                                                                                                                                                                                              |
|                      |                                                                                                                               |                                                                                                                                     |                                                                                                           | Charred database                                                                                                                                                                                                                                                             |                                                                                                                                                                                                                                                                                          |                                                                                                                                                                                                                                              |
|                      |                                                                                                                               |                                                                                                                                     |                                                                                                           | highest vs. lowest quintile                                                                                                                                                                                                                                                  | MeIQx ( ng/1000<br>kcal/day)<br>0-11.83 vs. 70.03-<br>1188.52                                                                                                                                                                                                                            | Colon: 1.0 (0.8-1.2)<br>Rectum: 0.9 (0.7-1.2)<br>Colorectal: 0.9 (0.8-1.1)                                                                                                                                                                   |
|                      |                                                                                                                               |                                                                                                                                     |                                                                                                           |                                                                                                                                                                                                                                                                              | DiMeIQx ( ng/1000<br>kcal/day)<br>0-0.82 vs. 4.71-173.75                                                                                                                                                                                                                                 |                                                                                                                                                                                                                                              |
| Le, 2016 [66]<br>USA | Cohort study<br>2 cohorts:<br>1. Health<br>Professionals<br>Follow-up Study<br>(HPFS)<br><br>2. Nurses' Health<br>Study (NHS) | 29,615 men<br>40-75 y<br>418 colorectal cancer<br><br>65,785 women<br>30-55 y<br>790 colorectal cancer<br><br>14 years of follow up | Validate 131-item FFQ<br>cooking questionnaire<br><br>Charred database<br><br>highest vs. lowest quintile | PhIP<br>M: 0-33.5 vs. 165.4-2495.6<br>F: 0-35.6 vs. 229.9-1665.7<br><br>MeIQx<br>M: 0-4.2 vs. 63.5-353.2<br>F: 0-5.7 vs. 143.8-970.2<br><br>DiMeIQx<br>M: 0-0 vs. 1.9-39<br>F: 0-0.6 vs. 17.4-120.0<br><br>MDM<br>M: 0-1755 vs. 7717-54285<br>F: 0-2408 vs. 12981-<br>171620 | Colorectal<br>Male: 1.01 (0.72-1.41)<br>Female: 1.14 (0.90-1.45)<br><br>Colorectal<br>Male: 1.22 (0.89-1.68)<br>Female: 1.07 (0.86-1.34)<br><br>Colorectal<br>Male: 0.88 (0.65-1.19)<br>Female: 1.15 (0.93-1.43)<br><br>Colorectal<br>Male: 1.02 (0.73-1.41)<br>Female: 1.04 (0.83-1.30) | Age, 2-year follow-up<br>cycle, family history of<br>colorectal cancer in first<br>degree relatives, prior<br>lower gastrointestinal<br>endoscopy, smoking,<br>BMI, physical activity,<br>aspirin or NSAID, total<br>caloric intake, alcohol |
|                      |                                                                                                                               |                                                                                                                                     |                                                                                                           |                                                                                                                                                                                                                                                                              |                                                                                                                                                                                                                                                                                          | 9                                                                                                                                                                                                                                            |

<sup>1</sup>Quality score; <sup>2</sup>Food frequency questionnaire; <sup>3</sup>2-amino-1-methyl-6-phenylimidazo[4,5-b]pyridine; <sup>4</sup>2-amino-3,8-dimethyl imidazo [4,5-f]quinoxaline; <sup>5</sup>2-amino-3-methylimidazo[4,5-f]quinoline; <sup>6</sup>Body mass index; <sup>7</sup>2-amino-3,4,8-trimethylimidazo[4,5-f] quinoxaline; <sup>8</sup>2-amino-3,4-dimethylimidazo[4,5-f]quinoline; <sup>9</sup>Meat-derived mutagenicity; <sup>10</sup>Benzo(a)pyrene; <sup>11</sup>Risk factor questionnaire; <sup>12</sup>On line database containing data on heterocyclic amines and MDM: <http://charred.cancer.gov/>; <sup>13</sup>Diet history questionnaire; <sup>14</sup>Nonsteroidal anti-inflammatory drugs; \*data from these studies were derived from the same recruited population.
